# Supplementary material for: Burden of Diabetes on the Ability to Work
Source: Oxford University Press journal article supplement (doi:10.2337/dc12-0354), 2013-02-13
Supplement: dc120354supplementarydata.pdf [file dc120354supplementarydata.pdf]

## SUPPLEMENTARY DATA

### Search strategy for the major database used: PUBMED

- # 1 "diabetes" [MeSh]
- # 2 "diabetes" [Title/Abstract]
- # 3 "hypoglycemia" [MeSh]
- # 4 "hypoglycemia" [Title/Abstract]
- # 5 "hyperglycemia" [MeSh]
- # 6 "hyperglycemia" [Title/Abstract]
- # 7 "glycosylated hemoglobin" [MeSh]
- # 8 "glycosylated hemoglobin" [Title/Abstract]
- # 9 # 1 OR # 2 OR # 3 OR # 4 OR # 5 OR # 6 OR # 7 OR #8
- # 10 "efficiency"[Mesh]
- # 11 "efficiency"[Title/Abstract]
- # 12 "lost productivity" [Title/Abstract]
- # 13 "loss productivity" [Title/Abstract]
- # 14 "work productivity" [Title/Abstract]
- # 15 "lost productive time" [Title/Abstract]
- # 16 "lost time" [Title/Abstract]
- # 17 "work lost" [Title/Abstract]
- # 18 "work loss" [Title/Abstract]
- # 19 "employment"[Mesh]
- # 20 "employment"[Title/Abstract]
- # 21 "work performance" [Title/Abstract]
- # 22 "work limitation" [Title/Abstract]
- # 23 "presenteeism" [Title/Abstract]
- # 24 "absenteeism"[Mesh]
- # 25 "absenteeism"[Title/Abstract]
- # 26 "disabled persons"[Mesh]
- # 27 "disabled persons"[Title/Abstract]
- # 28 "sick leave"[Mesh]
- # 29 "sick leave"[TIAB]
- # 30 "retirement"[Mesh]
- # 31 "retirement"[TIAB]
- # 32 # 10 OR #11 OR #12 OR #13 OR #14 OR #15 OR # 16 OR #17 OR #18 OR #19 OR #20 OR #21 OR #22 OR #23 OR 24 OR #25 OR #26 OR #27 OR #28 OR #29 OR #30 OR #31
- # 33 #9 AND #32
- # 24 Limits: Humans, All Adult: 19+ years, Adolescent: 13-18 years

SUPPLEMENTARY DATA

**Supplementary Table 1.** Summary of characteristics of included studies on the impact of type 2 diabetes on ability to work

| Authors                                | Country             | Period of data collection | Population                                                | Age   | Type of diabetes     | Diabetes assessment<br>Data collection instrument |
|----------------------------------------|---------------------|---------------------------|-----------------------------------------------------------|-------|----------------------|---------------------------------------------------|
| <b>Cohort</b>                          |                     |                           |                                                           |       |                      |                                                   |
| daCosta Dibonaventura et al., 2011(16) | United States       | 2006 to 2008              | General population                                        | ≥18   | 1 and 2              | Questionnaire                                     |
| Herquelot et al., 2011 (7)             | France              | 1989 to 2007              | Employees                                                 | 35-60 | 1 and 2              | Questionnaire                                     |
| De Backer et al., 2006 (18)            | Belgium             | 1994 to 1998              | Employees                                                 | 35-59 | 1 and 2 <sup>†</sup> | Questionnaire                                     |
| Tunceli et al., 2005 (22)              | United States       | 1992, 1994                | General population                                        | 51-61 | 1 and 2              | Questionnaire <sup>‡</sup>                        |
| Vijan et al., 2004 (5)                 | United States       | 1994, 1996, 1998, 2000    | General population                                        | 51-61 | 1 and 2              | Questionnaire <sup>‡</sup>                        |
| <b>Case-control</b>                    |                     |                           |                                                           |       |                      |                                                   |
| Robinson et al., 1990 (35)             | United Kingdom      | 1985 to 1987              | Patients of diabetes clinics/friends of diabetes patients | 17-65 | 1 and 2              | List of diabetes patients                         |
| <b>Cross-sectional</b>                 |                     |                           |                                                           |       |                      |                                                   |
| Holden et al., 2011 (20)               | Australia           | 2004 to 2005              | Employees                                                 | 18-70 | 1 and 2 <sup>†</sup> | WHO-HPQ                                           |
| Lenneman et al., 2011 (33)             | United States       | 2005 to 2009              | General population                                        | ≥18   | 1 and 2              | HealthMedia Succeed HRA questionnaire             |
| Fu et al., 2009 (19)                   | United States       | 2004, 2006                | General population                                        | ≥18   | 1 and 2              | MEPS databases                                    |
| Vamos et al., 2009 (21)                | Hungary             | 2002                      | General population                                        | >18   | 1 and 2              | Questionnaire                                     |
| Alavinia et al., 2008 (4)              | European countries* | 2004                      | General population                                        | 50-64 | 1 and 2 <sup>†</sup> | CAPI <sup>‡</sup>                                 |
| Cawley et al., 2008 (17)               | United States       | 2000 to 2004              | General population                                        | 18-64 | 1 and 2              | MEPS database                                     |
| Kannan et al., 2008 (30)               | United States       | 2006                      | General population <sup>§</sup>                           | 18-92 | 2                    | Questionnaire                                     |
| Stewart et al., 2007 (34)              | United States       | 2001 to 2004              | General population                                        | 40-65 | 1 and 2              | CAPI                                              |

SUPPLEMENTARY DATA

| Authors                    | Country       | Period of data collection | Population         | Age     |                  | Diabetes assessment                 |
|----------------------------|---------------|---------------------------|--------------------|---------|------------------|-------------------------------------|
|                            |               |                           |                    |         | Type of diabetes | Data collection instrument          |
| Collins et al., 2005 (29)  | United States | 2002                      | Employees          | All age | 1 and 2          | SPS, ICD-9 codes and drugs          |
| Boles et al., 2004 (14)    | United States | 2001                      | Employees          | All age | 1 and 2          | HRA questionnaire                   |
| Burton et al., 2004 (28)   | United States | 2002                      | Employees          | 18-64   | 1 and 2          | HRA questionnaire                   |
| Vijan et al., 2004 (5)     | United States | 1992                      | General population | 51-61   | 1 and 2          | Questionnaire <sup>‡</sup>          |
| Lavigne et al., 2003 (32)  | United States | 1999                      | Employees          | ≤64     | 2                | Claim data and medical chart        |
| Yassin et al., 2002 (6)    | United States | 1994                      | General population | 18-64   | 1 and 2          | Questionnaire                       |
| Kessler et al., 2001 (31)  | United States | 1995 to 1996              | General population | 25-54   | 1 and 2          | Questionnaire                       |
| Ng et al., 2001 (10)       | United States | 1989                      | General population | 18-65   | 2                | Questionnaire <sup>‡</sup>          |
| Burton et al., 1999 (15)   | United States | 1994 to 1995              | Employees          | All age | 1 and 2          | Health Risk Appraisal questionnaire |
| Mayfield et al., 1999 (12) | United States | 1987                      | General population | ≥25     | 1 and 2          | Questionnaire <sup>‡</sup>          |

CAPI: Computer Assisted Personal Interviewing; HRA: Health Risk Assessment; ICD-9: International Classification of Diseases, Ninth Revision; MEPS: Medical Expenditure Panel Survey; SPS: Stanford Presenteeism Scale ; WHO-HPQ: World Health Organization Health and Productivity Questionnaire

\*Sweden, Denmark, the Netherlands, Germany, Austria, Switzerland, France, Italy, Spain, Greece

<sup>†</sup>Information obtained from the author

<sup>‡</sup>Information obtained from the official survey website

<sup>§</sup>Overweight or obese individuals

SUPPLEMENTARY DATA

**Supplementary Table 2.** Quality of studies included in the review based on the modified Newcastle-Ottawa Scale for assessing cross-sectional studies

|                                       | Alavinia et al., 2008 (4) | Boles et al., 2004 (14) | Burton et al., 2004 (28) | Burton et al., 1999 (15) | Cawley et al., 2008 (17) | Collins et al., 2005 (29) | Fu et al., 2009 (19) | Holden et al., 2011 (20) | Kannan et al., 2008 (30) | Kessler et al., 2001 (31) | Lavigne et al., 2003 (32) | Lenneman et al., 2011 (33) | Mayfield et al., 1999 (12) | Ng et al., 2001 (10) | Stewart et al., 2007 (34) | Vamos et al., 2009 (21) | Vijan et al., 2004 (5) | Yassin et al., 2002 (6) |   |
|---------------------------------------|---------------------------|-------------------------|--------------------------|--------------------------|--------------------------|---------------------------|----------------------|--------------------------|--------------------------|---------------------------|---------------------------|----------------------------|----------------------------|----------------------|---------------------------|-------------------------|------------------------|-------------------------|---|
| <b>Quality criteria's</b>             |                           |                         |                          |                          |                          |                           |                      |                          |                          |                           |                           |                            |                            |                      |                           |                         |                        |                         |   |
| <b>Selection</b>                      |                           |                         |                          |                          |                          |                           |                      |                          |                          |                           |                           |                            |                            |                      |                           |                         |                        |                         |   |
| Representativeness of the study group | *                         |                         |                          |                          | *                        |                           | *                    |                          |                          |                           |                           | *                          | *                          | *                    | *                         | *                       |                        | *                       | * |
| Selection of the comparison group     | *                         | *                       | *                        | *                        | *                        | *                         | *                    | *                        | *                        | *                         |                           |                            | *                          | *                    | *                         | *                       | *                      | *                       | * |
| Ascertainment of exposure             | *                         |                         |                          |                          | *                        |                           | *                    |                          |                          |                           | *                         |                            | *                          | *                    | *                         | *                       | *                      | *                       | * |
| <b>Comparability</b>                  |                           |                         |                          |                          |                          |                           |                      |                          |                          |                           |                           |                            |                            |                      |                           |                         |                        |                         |   |
| Controls for age or other factors *   | *                         | *                       | *                        |                          | *                        | *                         | **                   | *                        | *                        | *                         | *                         |                            | *                          | *                    | *                         | **                      | *                      | *                       | * |
| <b>Outcome</b>                        |                           |                         |                          |                          |                          |                           |                      |                          |                          |                           |                           |                            |                            |                      |                           |                         |                        |                         |   |
| Ascertainment of outcome              |                           |                         |                          |                          |                          |                           |                      |                          |                          |                           |                           |                            |                            |                      |                           |                         |                        |                         |   |
| <b>Total stars</b> †                  | 4                         | 2                       | 2                        | 1                        | 4                        | 2                         | 5                    | 2                        | 2                        | 2                         | 2                         | 1                          | 4                          | 4                    | 4                         | 5                       | 3                      | 4                       |   |

\* Others factors included: demographic factors (gender, level of education), lifestyle factors (tobacco) and presence of co-morbidity

† A study can be awarded a maximum of one star for each numbered item within the selection and outcome sections. A maximum of two stars can be given for comparability (one star for controlling for age and one star for controlling for any other factors). A maximum of 6 stars is allowed for each study.

SUPPLEMENTARY DATA

**Supplementary Table 3.** Quality of studies included in the review based on the Newcastle-Ottawa Scale for assessing cohort studies

|                                            | daCosta Dibonaventura et al., 2011<br>(16) | De Backer et al., 2006 (18) | Herquelot et al., 2011 (7) | Tunceli et al., 2005 (22) | Vijan et al., 2004 (5) |
|--------------------------------------------|--------------------------------------------|-----------------------------|----------------------------|---------------------------|------------------------|
| <b>Quality criteria's</b>                  |                                            |                             |                            |                           |                        |
| <b>Selection</b>                           |                                            |                             |                            |                           |                        |
| Representativeness of the exposed cohort   | *                                          |                             |                            |                           |                        |
| Selection of the non- exposed cohort       | *                                          | *                           | *                          | *                         | *                      |
| Ascertainment of exposure                  |                                            |                             |                            | *                         | *                      |
| <b>Comparability</b>                       |                                            |                             |                            |                           |                        |
| Controls for age or other factors *        | *                                          | *                           | *                          | *                         | *                      |
| <b>Outcome</b>                             |                                            |                             |                            |                           |                        |
| Ascertainment of outcome                   |                                            | *                           | *                          |                           |                        |
| Follow-up long enough for outcome to occur | *                                          | *                           | *                          | *                         | *                      |
| Adequacy of follow up of cohorts           |                                            | *                           | *                          | *                         |                        |
| <b>Total stars<sup>†</sup></b>             | 4                                          | 5                           | 5                          | 5                         | 4                      |

\* Others factors included: demographic factors (gender, level of education), lifestyle factors (tobacco) and presence of co-morbidity

† A study can be awarded a maximum of one star for each numbered item within the selection and outcome sections. A maximum of two stars can be given for comparability (one star for controlling for age and one star for controlling for any other factors). A maximum of 8 stars is allowed for each study.

SUPPLEMENTARY DATA

**Supplementary Table 4.** Quality of studies included in the review based on the modified Newcastle-Ottawa Scale for assessing case-control studies

|                                                     |                            |
|-----------------------------------------------------|----------------------------|
|                                                     | Robinson et al., 1990 (35) |
| <b>Quality criteria's</b>                           |                            |
| <b>Selection</b>                                    |                            |
| Adequate case definition                            | *                          |
| Representativeness of the cases                     | *                          |
| Selection of controls                               | *                          |
| Definition of controls                              |                            |
| <b>Comparability</b>                                |                            |
| Controls for age or others factors*                 |                            |
| <b>Exposure</b>                                     |                            |
| Ascertainment of exposure                           |                            |
| Same method of ascertainment for cases and controls | *                          |
| Non-response rate                                   |                            |
| <b>Total stars<sup>†</sup></b>                      | <b>4</b>                   |

\* Other factors included: demographic factors (gender, level of education), lifestyle factors (tobacco) and presence of co-morbidity

† A study can be awarded a maximum of one star for each numbered item within the selection and outcome sections. A maximum of two stars can be given for comparability (one star for controlling for age and one star for controlling for any others factors). A maximum of 9 stars is allowed for each study.

SUPPLEMENTARY DATA

**Supplementary Table 5.** Results of included studies on the impact of type 2 diabetes on absenteeism with a high risk of bias

| Authors                                |     | Study population |             | Outcome                                                             |                            | Statistical method | Adjustment variables | Results                                              |        |                              |                              | Quality score |
|----------------------------------------|-----|------------------|-------------|---------------------------------------------------------------------|----------------------------|--------------------|----------------------|------------------------------------------------------|--------|------------------------------|------------------------------|---------------|
|                                        | Sex | Diabetes         | No diabetes | Definition                                                          | Data collection instrument |                    |                      | Summary measure                                      | 95% CI | % of people with the outcome | Days lost/year               |               |
|                                        |     | N                | N           |                                                                     |                            |                    |                      | (D/no D)                                             |        | (D/no D)                     | (D/no D)                     |               |
|                                        |     |                  |             |                                                                     |                            |                    |                      |                                                      |        |                              |                              |               |
|                                        |     |                  |             |                                                                     |                            |                    |                      |                                                      |        |                              |                              |               |
| <b>Cohort</b>                          |     |                  |             |                                                                     |                            |                    |                      |                                                      |        |                              |                              |               |
| daCosta Dibonaventura et al., 2011(16) | F-M | 1037             | 8162        | Percentage of time lost from work in the past 7 days due to illness | WPAI                       | GEE                | A B C E S I R Q      | Mean= 3.49%/ 4.74%* / 2.91% <sup>†</sup>             | -      |                              | 8.8, 11.9*/ 7.3 <sup>‡</sup> | 4             |
|                                        |     | 290*             |             |                                                                     |                            |                    |                      |                                                      |        |                              |                              |               |
| Vijan et al., 2004 (5)                 | F-M | N/A              | N/A         | Days of work lost in the previous year                              | Questionnaire <sup>§</sup> | Two-part reg.      | A E S M R            | 2.4 more days lost in the previous year <sup>†</sup> | -      |                              | 2.7 / 2.4                    | 4             |
|                                        |     |                  |             |                                                                     |                            |                    |                      |                                                      |        |                              |                              |               |
| <b>Case-control</b>                    |     |                  |             |                                                                     |                            |                    |                      |                                                      |        |                              |                              |               |
| Robinson et al., 1990 (35)             | F-M | 2104             | 1602        | Any time of work lost due to illness in the previous year           | Questionnaire              | -                  | -                    | RR=1.09 <sup>  </sup>                                | -      | 49.0/45.0                    | -                            | 4             |
|                                        | F-M | 1999             |             | > 10 days of work lost in the previous year                         |                            |                    |                      | RR=1.46 <sup>§</sup>                                 | -      | 57.0/39.0                    | -                            |               |
|                                        | F-M | 161              |             | > 20 days of work lost due to illness in the previous year          |                            |                    |                      | RR=1.81 <sup>§</sup>                                 | -      | 29.0/16.0                    | -                            |               |
|                                        |     |                  |             |                                                                     |                            |                    |                      |                                                      |        |                              |                              |               |
| <b>Cross-</b>                          |     |                  |             |                                                                     |                            |                    |                      |                                                      |        |                              |                              |               |

SUPPLEMENTARY DATA

| Authors                   |     | Study population |             | Outcome                                                                   |                            | Statistical method     | Adjustment variables                                                                              | Results                                    |           |                              |                         | Quality score |
|---------------------------|-----|------------------|-------------|---------------------------------------------------------------------------|----------------------------|------------------------|---------------------------------------------------------------------------------------------------|--------------------------------------------|-----------|------------------------------|-------------------------|---------------|
|                           | Sex | Diabetes         | No diabetes | Definition                                                                | Data collection instrument |                        |                                                                                                   | Summary measure                            | 95% CI    | % of people with the outcome | Days lost/year          |               |
|                           |     | N                | N           |                                                                           |                            |                        |                                                                                                   | (D/no D)                                   |           | (D/no D)                     | (D/no D)                |               |
| <b>sectional</b>          |     |                  |             |                                                                           |                            |                        |                                                                                                   |                                            |           |                              |                         |               |
| Holden et al., 2011 (20)  | F-M | 1478             | 72,417      | Whole or half days lost from work in the previous 4 weeks                 | WHO-HPQ <sup>s</sup>       | Negative binomial reg. | A C C <sub>23</sub> C <sub>24</sub><br>E I M S U<br>Q <sub>1</sub> -Q <sub>8</sub>                | IRR=0.89 <sup>†</sup>                      | 0.83-0.96 | -                            | N/A                     | 2             |
| Collins et al., 2005 (29) | F-M | 189              | N/A         | Hours of work lost in the past 4 weeks                                    | SPS                        | Logistic reg.          | A C C <sub>19</sub> Q <sub>8</sub><br>Q <sub>13</sub> O R S T                                     | OR=1.2                                     | -         |                              | 16.3 / N/A              | 2             |
| Boles et al., 2004 (14)   | F-M | 67               | 2 197       | Percentage of time work lost due to illness in the past 7 days            | WPAI                       | Logistic reg.          | A B C <sub>16</sub> C <sub>18</sub><br>C <sub>21</sub> D S H P<br>T V X Z                         | OR=2.29 <sup>†</sup>                       | 1.17-4.47 | -                            | 10.6 / 4.2 <sup>‡</sup> | 2             |
| Vijan et al., 2004 (5)    | F-M | N/A              | N/A         | Days of work lost in the previous year                                    | Questionnaire <sup>s</sup> | Logistic reg.          | A E S M R                                                                                         | OR=1.3                                     | 1.1-1.7   |                              | 4.0 / 6.6 <sup>†</sup>  | 3             |
| Lavigne et al., 2003 (32) | F-M | N/A              | N/A         | Whole or half days lost from work in the past 4 years                     | HLQ                        | Poisson reg.           | A E S M P R<br>C <sub>1</sub> C <sub>3</sub> K Q <sub>9</sub> -<br>Q <sub>12</sub> W <sub>1</sub> | 1.18 more days lost per month              | -         |                              | N/A                     | 2             |
| Kessler et al., 2001 (31) | F-M | 77               | 1996        | Days of work lost due to illness or work-cutback days in the past 4 weeks | Questionnaire              | Logistic reg.          | A C E O S                                                                                         | OR=1.1                                     | 0.6-1.9   |                              | 45.0/N/A                | 2             |
| Burton et al., 1999 (15)  | F-M | 15               | 549         | Hours of work lost due to illness per week                                | OMNI                       | ANOVA                  | -                                                                                                 | Mean=0.49 hours lost per week <sup>†</sup> | -         |                              | 3.0 / N/A               | 2             |
|                           |     |                  |             | Hours of works lost due to short time disability per                      | OMNI                       | ANOVA                  | -                                                                                                 | Mean=2.15 hours lost per                   | -         |                              | 32.5 / N/A              | 1             |

SUPPLEMENTARY DATA

| Authors |     | Study population |              | Outcome    |                            | Statistical method | Adjustment variables | Results           |        |                              |                | Quality score |
|---------|-----|------------------|--------------|------------|----------------------------|--------------------|----------------------|-------------------|--------|------------------------------|----------------|---------------|
|         | Sex | Diabetes         | No diabetese | Definition | Data collection instrument |                    |                      | Summary measure   | 95% CI | % of people with the outcome | Days lost/year |               |
|         |     | N                | N            |            |                            |                    |                      | (D/no D)          |        | (D/no D)                     | (D/no D)       |               |
|         |     |                  |              | week       |                            |                    |                      | week <sup>†</sup> |        |                              |                |               |

ANOVA: analysis of variance; CI: confidence interval; D: diabetes; F:female; GEE: generalized estimating equation; HLQ: Health labor questionnaire; M; male; N/A: not available; OMNI: occupational medical and nursing information system; OR: odds ratio; IRR: incidence rate ratio; reg: regression; RR: relative risk; SPS: Stanford Presenteeism Scale; WPAI: Work Productivity and Activity Impairment questionnaire; WHO-HPQ: World Health Organisation Health and Productivity Questionnaire

A:age; A<sup>2</sup>: age<sup>2</sup>; B:body mass index; B<sub>1</sub>:weight; B<sup>2</sup>: body mass index<sup>2</sup>; C:co-morbidities; C<sub>1</sub>:depression; C<sub>2</sub>:depression and diabetes; C<sub>3</sub>:hypertension; C<sub>4</sub>:allergy; C<sub>5</sub>:arthritis; C<sub>6</sub>:asthma; C<sub>7</sub>:back pain; C<sub>8</sub>:cancer; C<sub>9</sub>:heart disease; C<sub>10</sub>:heartburn; C<sub>11</sub>:irritable bowel; C<sub>12</sub>:kidney disease; C<sub>13</sub>:menopause; C<sub>14</sub>:osteoporosis; C<sub>15</sub>:diabetes; C<sub>16</sub>:cholesterol; C<sub>17</sub>:chronic obstructive pulmonary disease; C<sub>18</sub>:congestive heart failure; C<sub>18</sub>:blood pressure; C<sub>19</sub>:biometrics; C<sub>20</sub>:number of health condition; C<sub>21</sub>:total health risk; C<sub>22</sub>:health status; C<sub>23</sub>:occasions of treatment for any reason except pregnancy; C<sub>24</sub>:not treatment for a specific condition; C<sub>25</sub>: self-perceived health; D:Diet; E:education; F:region of residence; F2:urban area; H:alcohol use; I: income; I<sub>1</sub>:log of other household income; I<sub>2</sub>:own home; J: diabetes severity; K:year since diabetes diagnosis; L: immigration status; L<sub>1</sub>: years since immigration; L<sub>2</sub>: english proficiency; M : marital status; M<sub>1</sub>: household head; N:medical cost; O:occupation; P:physical activity/inactivity; Q:employment; Q<sub>1</sub>:work-related factors of occupation; Q<sub>2</sub>:industry; Q<sub>3</sub>: public/private sector; Q<sub>4</sub>:job security contractor; Q<sub>5</sub>: workplace accidents per 100 workers in the previous 4 weeks; Q<sub>6</sub>:supervisory role; Q<sub>7</sub>:hours expected to work in a 7-day week by their employer; Q<sub>8</sub>:hours worked per week; Q<sub>9</sub>:employed at a major US corporation; Q<sub>10</sub>:number of jobs worked; Q<sub>11</sub>:shift work; Q<sub>12</sub>:job satisfaction; Q<sub>13</sub>: plan location; Q<sub>14</sub>:type of work; Q<sub>15</sub>:occupational grade at the hiring; R:race; S:sex; T:tobacco use; U:children; V:lack of emotional fulfillment; W:calendar year; X: overdue or preventive visits; X<sub>1</sub>:primary caregiver; X<sub>2</sub>:Health insurance; Y:interaction term; Y<sub>1</sub>:Error term; Z:stress.

\*Painful diabetes with peripheral neuropathy

<sup>†</sup> p < 0.05

<sup>‡</sup> Days lost per year were calculated by assuming that individuals were working 40 hours per week and 50 weeks a year

<sup>§</sup> Information obtained from the official survey website

<sup>||</sup> RR was calculated based on information provided in the articles

SUPPLEMENTARY DATA

**Supplementary Table 6.** Results of included studies on the impact of type 2 diabetes on presenteeism with high risk of bias

| Authors                                |     | Study population |             | Outcome                                                                        |                            | Statistical method        | Adjustment variables                                                                       | Results                                         |           |                              |                                 | Quality score |
|----------------------------------------|-----|------------------|-------------|--------------------------------------------------------------------------------|----------------------------|---------------------------|--------------------------------------------------------------------------------------------|-------------------------------------------------|-----------|------------------------------|---------------------------------|---------------|
|                                        | Sex | Diabetes         | No diabetes | Definition                                                                     | Data collection instrument |                           |                                                                                            | Summary measure                                 | 95% CI    | % of people with the outcome | Days lost/year                  |               |
|                                        |     | N                | N           |                                                                                |                            |                           |                                                                                            | (D/no D)                                        |           | (D/no D)                     | (D/no D)                        |               |
| <b>Cohort</b>                          |     |                  |             |                                                                                |                            |                           |                                                                                            |                                                 |           |                              |                                 |               |
| daCosta Dibonaventura et al., 2011(16) | F-M | 1037             | 8162        | Percentage of time impaired at work due to illness in the past 7 days          | WPAI                       | GEE                       | A B C E S I R Q                                                                            | Mean= 13.52% / 17.84%* / 12.78% <sup>†</sup>    | -         | -                            | 33.8, 44.4* / 31.9 <sup>‡</sup> | 4             |
|                                        |     | 290*             |             |                                                                                |                            |                           |                                                                                            |                                                 | -         |                              |                                 |               |
| <b>Cross-sectional</b>                 |     |                  |             |                                                                                |                            |                           |                                                                                            |                                                 |           |                              |                                 |               |
| Holden et al., 2011 (20)               | F-M | 1449             | 70,990      | Performance in the past 4 weeks (score)                                        | WHO-HPQ <sup>§</sup>       | Multinomial logistic reg. | A C C <sub>23</sub> C <sub>24</sub> E I M S U Q <sub>1</sub> -Q <sub>8</sub>               | RRR=0.92                                        | 0.75-1.13 | -                            | N/A                             | 2             |
| Boles et al., 2004 (14)                | F-M | 67               | 2197        | Percentage of time impaired at work due to illness in the past 7 days          | WPAI                       | Logistic reg.             | A B C <sub>16</sub> C <sub>18</sub> , C <sub>21</sub> D G H P T V X Z                      | OR=1.27                                         | 0.72-2.23 | -                            | 23.1/16.2 <sup>‡</sup>          | 2             |
| Lavigne et al., 2003 (32)              | F-M | N/A              | N/A         | Work efficiency losses due to working while feeling unwell in the past 4 weeks | HLQ                        | Tobit reg.                | A E S M P R C <sub>1</sub> C <sub>3</sub> K Q <sub>9</sub> -Q <sub>12</sub> W <sub>1</sub> | Work efficiency reduced by 0.87 hours per month | -         | 10 / 15                      | N/A                             | 2             |

CI: confidence interval; D: diabetes; F: female; GEE: generalized estimating equation; HLQ: Health labor questionnaire; M: male; N/A: not available; OR: odds ratio; reg: regression; RRR: relative risk ratio; WPAI: Work Productivity and Activity Impairment questionnaire; WHO-HPQ: World Health Organisation Health and Productivity Questionnaire

Adjustment variables: see Supplemental Table S<sub>5</sub> legend

\*Painful diabetes with peripheral neuropathy

<sup>†</sup> p < 0.05

<sup>‡</sup> Days lost per year were calculated by assuming that individuals were working 40 hours per week and 50 weeks a year

<sup>§</sup> Information obtained from the official survey website

SUPPLEMENTARY DATA

**Supplementary Table 7.** Results of included studies on the impact of type 2 diabetes on productivity with high risk of bias

| Authors                                |     | Study population |             | Outcome                                                                                                      |                            | Statistical method | Adjustment variables                                       | Results                                                                         |           |                              |                      | Quality score |
|----------------------------------------|-----|------------------|-------------|--------------------------------------------------------------------------------------------------------------|----------------------------|--------------------|------------------------------------------------------------|---------------------------------------------------------------------------------|-----------|------------------------------|----------------------|---------------|
|                                        | Sex | Diabetes         | No diabetes | Definition                                                                                                   | Data collection instrument |                    |                                                            | Summary measure                                                                 | 95% CI    | % of people with the outcome | Days lost/year       |               |
|                                        |     | N                | N           |                                                                                                              |                            |                    |                                                            | (D/no D)                                                                        |           | (D/no D)                     | (D/no D)             |               |
| <b>Cohort</b>                          |     |                  |             |                                                                                                              |                            |                    |                                                            |                                                                                 |           |                              |                      |               |
| daCosta Dibonaventura et al., 2011(16) | F-M | 1037             | 8162        | Percentage of time lost from work plus percentage of time impaired at work due to illness in the past 7 days | WPAI                       | GEE                | A B C E S I<br>R Q                                         | Mean= 13.75% / 19.77%* / 13.17% †                                               | -         | -                            | 34.4, 49.4* / 33.1 ‡ | 4             |
|                                        |     | 290*             |             |                                                                                                              |                            |                    |                                                            |                                                                                 |           |                              |                      |               |
| <b>Cross-sectional</b>                 |     |                  |             |                                                                                                              |                            |                    |                                                            |                                                                                 |           |                              |                      |               |
| Lenneman et al., 2011 (33)             | F-M | N/A              | N/A         | Percentage of productivity impairment at work in the past 4 weeks                                            | WPAI                       | Linear reg.        | C <sub>1</sub> C <sub>16</sub> -C <sub>18</sub> D<br>P T Z | 1.82% more productivity lost in the past 4 weeks                                | 0.72-2.82 | -                            | N/A                  | 1             |
| Kannan et al., 2008 (30)               | F-M | 3 576            | 16,183      | Work time lost from work plus time impaired or reduced at work due to illness in the past 7 days (score)     | WPAI                       | Linear reg.        | A S R T C <sub>3</sub><br>C <sub>16</sub>                  | Strong association between diabetes and work productivity loss score (B=7.57) † | -         | -                            | N/A                  | 2             |
| Burton et al., 2004 (28)               | F-M | 479              | 16,172      | Time management in the previous 2 weeks                                                                      | WLQ                        | Logistic reg.      | AC <sub>1</sub> C <sub>3</sub> -C <sub>14</sub> S          | OR=1.40 †                                                                       | 1.14-1.73 | 30.5/N/A                     | N/A                  | 2             |
|                                        |     |                  |             | Physical work activities in the                                                                              | WLQ                        | Logistic reg.      | AC <sub>1</sub> C <sub>3</sub> -C <sub>14</sub> S          | OR=1.42 †                                                                       | 1.15-1.75 | 29.4/N/A                     | N/A                  |               |

SUPPLEMENTARY DATA

|                           |     |     |     |                                                                                   |     |            |                                                                                                  |                               |           |          |     |   |
|---------------------------|-----|-----|-----|-----------------------------------------------------------------------------------|-----|------------|--------------------------------------------------------------------------------------------------|-------------------------------|-----------|----------|-----|---|
|                           |     |     |     | previous 2 weeks                                                                  |     |            |                                                                                                  |                               |           |          |     |   |
|                           |     |     |     | Mental/inter-personal activities output in the previous 2 weeks                   |     |            |                                                                                                  | OR=1.23                       | 1.02-1.50 | 43.2/N/A | N/A |   |
|                           |     |     |     | Overall output in the previous 2 weeks                                            |     |            |                                                                                                  | OR=1.16                       | 0.95-1.42 | 35.3/N/A | N/A |   |
| Lavigne et al., 2003 (32) | F-M | N/A | N/A | Whole or half days lost from work plus work efficiency losses in the past 4 weeks | HLQ | Tobit reg. | A E S M P R<br>C <sub>1</sub> C <sub>3</sub> KQ <sub>9</sub> -<br>Q <sub>12</sub> W <sub>1</sub> | 8.23 more days lost per month | -         | -        | N/A | 2 |

CI: confidence interval; D: diabetes; F: female; GEE: generalized estimating equation; M: male; N/A: not available; OR: odds ratio; reg: regression; WLQ: Work Limitations Questionnaire; WPAI: Work Productivity and Activity Impairment questionnaire

Adjustment variables: see Supplemental Table S<sub>5</sub> legend

\*Painful diabetes with peripheral neuropathy

† p < 0.05

‡ Days lost per year were calculated by assuming that individuals were working 40 hours per week and 50 weeks a year

SUPPLEMENTARY DATA

**Supplementary Table 8.** Results of included studies on the impact of type 2 diabetes on retirement with high risk of bias

| Authors                |     | Study population |             | Retirement |                            | Statistical method | Adjustment variables | Results         |          |                              |                                         | Quality score |
|------------------------|-----|------------------|-------------|------------|----------------------------|--------------------|----------------------|-----------------|----------|------------------------------|-----------------------------------------|---------------|
|                        | Sex | Diabetes         | No diabetes | Definition | Data collection instrument |                    |                      | Summary measure | 95% CI   | % of people with the outcome | Years retired earlier                   |               |
|                        |     | N                | N           |            |                            |                    |                      | (D/no D)        |          | (D/no D)                     | (D/no D)                                |               |
| <b>Cohort</b>          |     |                  |             |            |                            |                    |                      |                 |          |                              |                                         |               |
| Vijan et al., 2004 (5) | F-M | N/A              | N/A         | N/A        | Questionnaire*             | Two-part reg.      | A S E M R            | N/A             | N/A      | 12.0/9.0                     | Retired 0.14 years earlier <sup>†</sup> | 4             |
| <b>Cross-sectional</b> |     |                  |             |            |                            |                    |                      |                 |          |                              |                                         |               |
| Vijan et al., 2004 (5) | F-M | N/A              | N/A         | N/A        | Questionnaire*             | Logistic reg.      | A S E M R            | OR=1.3          | 1.0-1.07 | -                            | Retired 0.12 years earlier <sup>†</sup> | 3             |

CI: confidence interval; D: diabetes; F: female; M: male; N/A: not available; OR: odds ratio; reg: regression

Adjustment variables: see Supplemental Table S<sub>5</sub> legend

\* Information obtained from the official survey website

<sup>†</sup> p < 0.05

## SUPPLEMENTARY DATA
